# Supplementary material for: Identification of Interactions between Proteins Encoded by Grapevine Leafroll-Associated Virus 3
Source: MDPI journal article supplement (doi:10.3390/v15010208), 2023-01-11
Supplement: s1 [file s1]

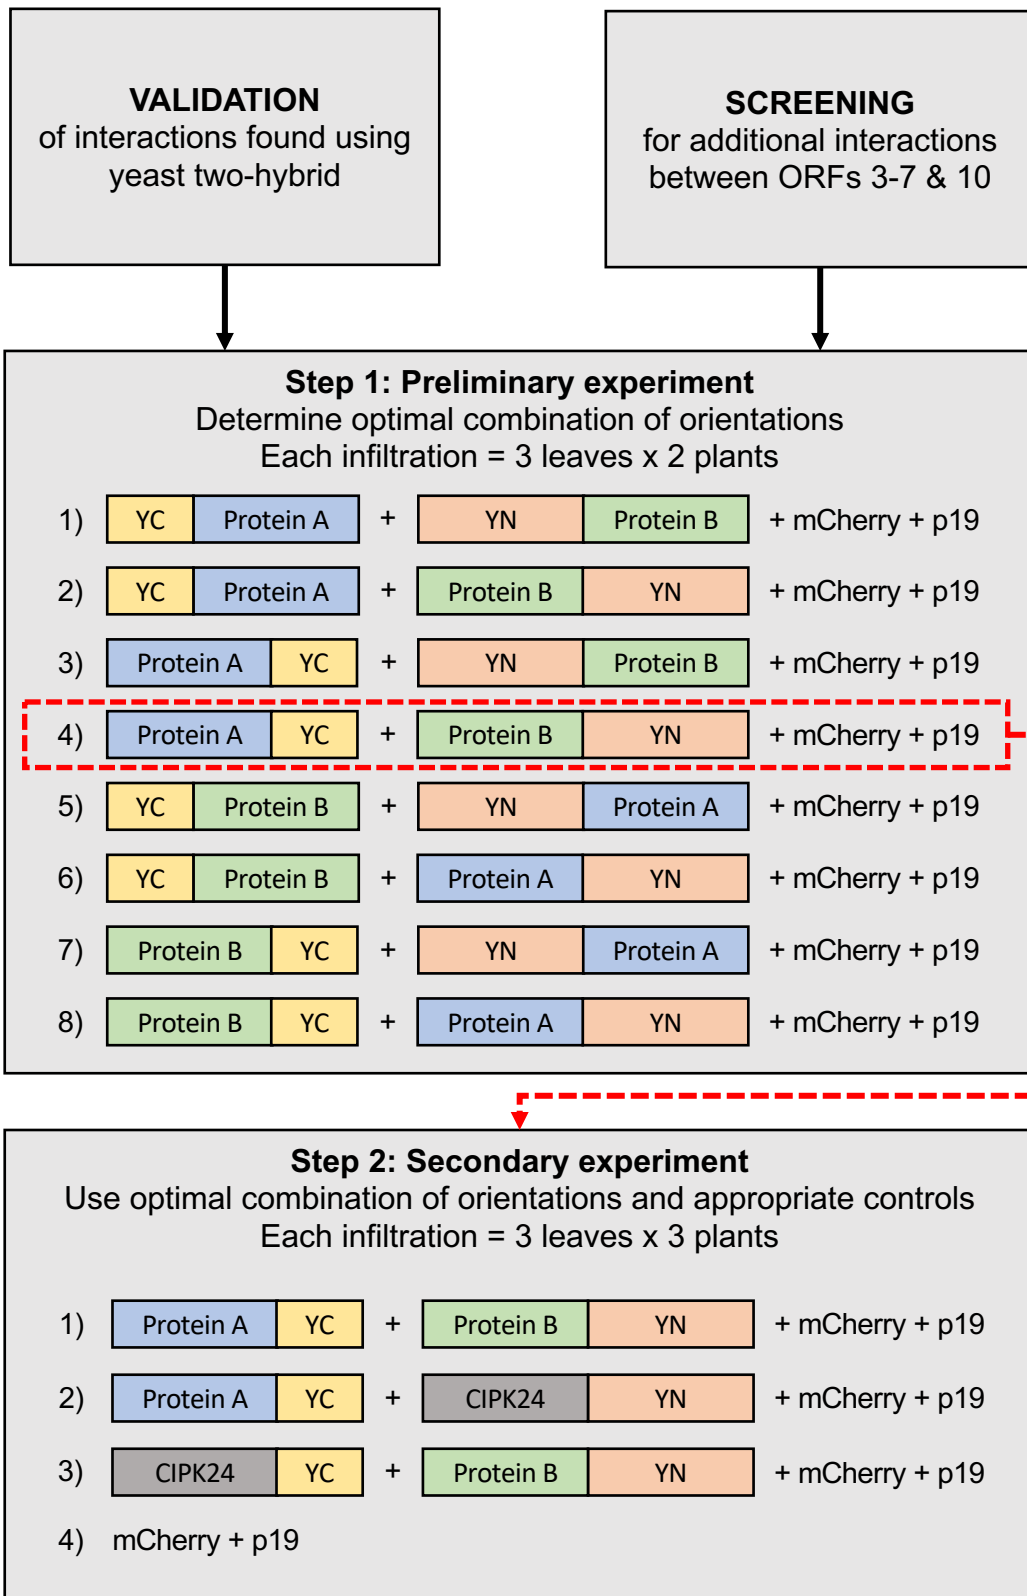

**Figure S1:** A summary of the bimolecular complementation workflow followed to perform validation and screening assays. mCherry: pGPTVII-mCherry, expressing red fluorescent protein mCherry; p19: silencing suppressor; YC: C-terminus of yellow fluorescent protein (YFP), YN: N-terminus of YFP.
