# Supplementary material for: Identification of Interactions between Proteins Encoded by Grapevine Leafroll-Associated Virus 3
Source: Viruses. 2023 Jan 11;15(1):208. doi: 10.3390/v15010208 (PMC9865355; doi:10.3390/v15010208)
Supplement: Supplementary file 1 [file viruses-15-00208-s001.zip]

Archive with 5 entries (5 files):
- Figure S1.pdf
- Figures S2-S9.pdf
- Table S1.xlsx
- Table S2.xls
- Table S3.xlsm
