# Supplementary material for: Identification of Interactions between Proteins Encoded by Grapevine Leafroll-Associated Virus 3
Source: Viruses. 2023 Jan 11;15(1):208. doi: 10.3390/v15010208 (PMC9865355; doi:10.3390/v15010208)
Supplement: Supplementary file 1 [file viruses-15-00208-s001.zip › Table S1.xlsx]

## Sheet: Sheet1
Target	Primers 5' - 3' (RE site in bold)	Restriction Enzyme	Tm (°C)	Amplicon size (bp)
Yeast two-Hybrid
GLRaV-3 ORF 1a (5')	GTTTAGAATTCATGGATTACGTTCGTCCG	EcoRI	60.5	3148
	CATGGATCCTTGCTCACAGCTACACGC	N/A (BshTI in ORF1a)
GLRaV-3 ORF 1a (3')	AGGTTCACTATTCTACGACCG	N/A (BshTI in ORF1a)	60.5	3720
	TCATTGGATCCTCATATACCTCGAAAGCAACC	BamHI
GLRaV-3 ORF 1b	ATTATGGATCCCACTATAGCGTGGCTAACGC	BamHI	61	1718
	TTATTGAATTCCACCTCAATCAGTATCCGATG	EcoRI
GLRaV-3 ORF 2	AGCTTGGATCCCCTACCTTGACACAGGGC	BamHI	58	185
	ATATCGAATTCTGGAACATGTACAGTAGAGCG	EcoRI
GLRaV-3 ORF 3	ACACTGGATCCTCACACTGTCCTAAGACCTG	BamHI	56	160
	CGATCGAATTCATGGATGATTTTAAACAGGC	EcoRI
GLRaV-3 ORF 4	TTAAAGGATCCCCTCGTTAGGGTTTAATATCC	BamHI	58	1713
	ATGGAGAATTCGATATGGAAGTAGGTATAGATTTTGG	EcoRI
GLRaV-3 ORF 5	TATTTGGATCCTTAAAGCTGGTGTGGTAGAGTAG	BamHI	58	1492
	AATTAGAATTCATACAGATACGATTTCGAATGGA	EcoRI
GLRaV-3 ORF 6	TTATTGGATCCCACCGATTTATGGACATCG	BamHI	59	990
	AATTAGAATTCATGGCGTTTGAACTGAAATT	EcoRI
GLRaV-3 ORF 7	TTAAAGGATCCAAACTGGTCTGAATTCCATCTC	BamHI	58	1485
	AATTACATATGATGGGGGCTTATACACACAT	NdeI
GLRaV-3 ORF 8	TTATTGGATCCCGGAGCGAAAGTAACCTC	BamHI	58	599
	TTATTCATATGGAGATGGAATTCAGACCAGTT	NdeI
GLRaV-3 ORF 9	TTATAGAATTCGGTCCATGATGCTTTAACC	EcoRI	56	569
	TTATACATATGATGAGGTTACTTTCGCTCC	NdeI
GLRaV-3 ORF 10	TTATAGAATTCAACACAACATTTCTACAGCG	EcoRI	56	574
	TTATACATATGATGGACCTATCGTTTATTATCG	NdeI
GLRaV-3 ORF 11	TTATTGGATCCTCATCGCCTTCTACAAAAG	BamHI	55	133
	TTATAGAATTCATGTTGTGTTGTCAAGCC	EcoRI
GLRaV-3 ORF 12	TTATTGGATCCTCAGAGTATTAAACCGTGAGG	BamHI	56	352
	TTATTGAATTCGCGATGAGGCACTTAGAA	EcoRI
Y2H Screen F	CGACTCACTATAGGGCGAGC	N/A	51
Y2H Screen BR	CTCAAGACCCGTTTAGAGGC	N/A		158 + insert
Y2H Screen AR	CACAGTTGAAGTGAACTTGCG	N/A		178 + insert
Bimolecular fluorescence complementation
A. thaliana CIPK24	ATAGGCCTATGACAAAGAAAATGAGAAGAGTG	StuI	60	1354
	CCGGATCCAAACGTGATTGTTCTGAGAATC	BamHI
GLRaV-3 ORF 2	ATATACTAGTAACATGTACAGTAGAGCG	SpeI	52	175
	ATACTCGAGCCTTGACACAGGGC	XhoI
GLRaV-3 ORF 3	ATCAACTAGTATGGATGATTTTAAACAGGCAATAC	SpeI	61	155
	TCACCTCGAGCACTGTCCTAAGACCTGTATTAATG	XhoI
GLRaV-3 ORF 4	CTTGGATCCATGGAAGTAGGTATAGATTTTGG	BamHI	56	1666
	TACCCTCGAGTCCATTCAAAATCGTATCTGTATC	XhoI
GLRaV-3 ORF 5	CTAGACTAGTCGAATGGATAAATATATTTATATAACGG	SpeI	58	1472
	AATACTCGAGAAGCTGGTGTGGTAGAGTAG	XhoI
GLRaV-3 ORF 6	TGCGGATCCATGGCGTTTGAACTGAAATTAGG	BamHI	59	957
	CATCTCGAGTTTCTTCTGCAATAGTTGGAAGAC	XhoI
GLRaV-3 ORF 7	ATTAACTAGTATGGGGGCTTATACACAC	SpeI	60	1451
	ACTACTCGAGAATACTTTCTAAGATGTTATACGTCTC	XhoI
GLRaV-3 ORF 9	ATTAACTAGTATGAGGTTACTTTCGCTCC	SpeI	60	551
	TATCCTCGAGACCTAGAGATGAGATTAGTAAGTG	XhoI
GLRaV-3 ORF 10	TAGAGGCCTATGGACCTATCGTTTATTATCG	StuI	56	556
	TTATGGATCCCAGCGCTCCGCAAC	BamHI
BiFC inch F	TTCATTTGGAGAGAACACGG	N/A	54.5	pSPYCE(M) : 480 + insert
BiFC inch R	TGATAATCATCGCAAGACCG	N/A		pSPYCE(MR): 453 + insert
				pSPYNE173: 750 + insert
				pSPYNE(R)173: 720 + insert
mCherry	AAGGTCTAGAATGGTGAGCAAGGGCGAG	XbaI	63	731
	ACTTCTCGAGCTACTTGTACAGCTCGTCCATG	XhoI
Table S1: Complete list of primers used in this study. Primer sequences are presented with restriction enzyme recognition sites in bold and underscored. Restriction enzymes used to digest amplicons, melting temperatures and amplicon sizes (where applicable) are provided.
