# Supplementary material for: Identification of Interactions between Proteins Encoded by Grapevine Leafroll-Associated Virus 3
Source: Viruses. 2023 Jan 11;15(1):208. doi: 10.3390/v15010208 (PMC9865355; doi:10.3390/v15010208)
Supplement: Supplementary file 1 [file viruses-15-00208-s001.zip › Table S2.xls]

## Sheet: test1
p20B - p20B
ANOVA
	sum_sq	df	F	PR(>F)
C(Type)	78174.8	3	66.4365	7.75e-14
Residual	12551.3	32
Tukey's HSD
group1	group2	meandiff	p-adj	lower	upper	reject
YC-CIPK24 + YN-p20B	YC-p20B + YN-CIPK24	0.1619	0.9	-25.1321	25.4559	FALSE
YC-CIPK24 + YN-p20B	YC-p20B + YN-p20B	104.573	0.001	79.2792	129.867	TRUE
YC-CIPK24 + YN-p20B	mCherry	-8.4009	0.7835	-33.6949	16.8931	FALSE
YC-p20B + YN-CIPK24	YC-p20B + YN-p20B	104.411	0.001	79.1173	129.705	TRUE
YC-p20B + YN-CIPK24	mCherry	-8.5628	0.7739	-33.8568	16.7312	FALSE
YC-p20B + YN-p20B	mCherry	-112.974	0.001	-138.268	-87.6801	TRUE
p5 - p5
ANOVA
	sum_sq	df	F	PR(>F)
C(Type)	110473	3	112.1	4.67e-17
Residual	10511.9	32
Tukey's HSD
group1	group2	meandiff	p-adj	lower	upper	reject
YC-CIPK24 + YN-p5	YC-p5 + YN-CIPK24	1.2888	0.9	-21.8592	24.4367	FALSE
YC-CIPK24 + YN-p5	YC-p5 + YN-p5	109.717	0.001	86.5689	132.865	TRUE
YC-CIPK24 + YN-p5	mCherry	-39.0923	0.001	-62.2403	-15.9444	TRUE
YC-p5 + YN-CIPK24	YC-p5 + YN-p5	108.428	0.001	85.2801	131.576	TRUE
YC-p5 + YN-CIPK24	mCherry	-40.3811	0.001	-63.5291	-17.2331	TRUE
YC-p5 + YN-p5	mCherry	-148.809	0.001	-171.957	-125.661	TRUE
p20B - HSP70h
ANOVA
	sum_sq	df	F	PR(>F)
C(Type)	23142.6	3	49.1458	4.41e-12
Residual	5022.9	32
Tukey's HSD
group1	group2	meandiff	p-adj	lower	upper	reject
YC-CIPK24 + YN-HSP70h	YC-p20B + YN-CIPK24	-19.0858	0.0144	-35.0869	-3.0846	TRUE
YC-CIPK24 + YN-HSP70h	YC-p20B + YN-HSP70h	38.2206	0.001	22.2194	54.2217	TRUE
YC-CIPK24 + YN-HSP70h	mCherry	-27.6486	0.001	-43.6497	-11.6474	TRUE
YC-p20B + YN-CIPK24	YC-p20B + YN-HSP70h	57.3063	0.001	41.3052	73.3075	TRUE
YC-p20B + YN-CIPK24	mCherry	-8.5628	0.4794	-24.5639	7.4384	FALSE
YC-p20B + YN-HSP70h	mCherry	-65.8691	0.001	-81.8702	-49.868	TRUE
HSP70h - HSP70h
ANOVA
	sum_sq	df	F	PR(>F)
C(Type)	24708.7	3	51.7863	2.22e-12
Residual	5089.35	32
Tukey's HSD
group1	group2	meandiff	p-adj	lower	upper	reject
YC-CIPK24 + YN-HSP70h	YC-HSP70h + YN-CIPK24	6.7379	0.6547	-9.3687	22.8445	FALSE
YC-CIPK24 + YN-HSP70h	YC-HSP70h + YN-HSP70h	50.5122	0.001	34.4056	66.6188	TRUE
YC-CIPK24 + YN-HSP70h	mCherry	-21.595	0.0051	-37.7016	-5.4884	TRUE
YC-HSP70h + YN-CIPK24	YC-HSP70h + YN-HSP70h	43.7743	0.001	27.6677	59.881	TRUE
YC-HSP70h + YN-CIPK24	mCherry	-28.3329	0.001	-44.4395	-12.2263	TRUE
YC-HSP70h + YN-HSP70h	mCherry	-72.1072	0.001	-88.2138	-56.0006	TRUE
HSP70h - CP
ANOVA
	sum_sq	df	F	PR(>F)
C(Type)	15231	3	77.412	9.31e-15
Residual	2098.7	32
Tukey's HSD
group1	group2	meandiff	p-adj	lower	upper	reject
YC-CIPK24 + CP-YN	YC-HSP70h + CIPK24-YN	-10.5222	0.045	-20.8653	-0.1792	TRUE
YC-CIPK24 + CP-YN	YC-HSP70h + CP-YN	33.4882	0.001	23.1452	43.8313	TRUE
YC-CIPK24 + CP-YN	mCherry	-21.4644	0.001	-31.8075	-11.1214	TRUE
YC-HSP70h + CIPK24-YN	YC-HSP70h + CP-YN	44.0104	0.001	33.6674	54.3535	TRUE
YC-HSP70h + CIPK24-YN	mCherry	-10.9422	0.0349	-21.2853	-0.5992	TRUE
YC-HSP70h + CP-YN	mCherry	-54.9527	0.001	-65.2957	-44.6096	TRUE
p20B - CP
ANOVA
	sum_sq	df	F	PR(>F)
C(Type)	31235.9	3	57.9095	5.01e-13
Residual	5753.51	32
Tukey's HSD
group1	group2	meandiff	p-adj	lower	upper	reject
YC-CIPK24 + YN-CP	YC-p20B + YN-CIPK24	-16.6193	0.0598	-33.7447	0.506	FALSE
YC-CIPK24 + YN-CP	YC-p20B + YN-CP	50.7991	0.001	33.6738	67.9245	TRUE
YC-CIPK24 + YN-CP	mCherry	-25.1821	0.002	-42.3075	-8.0568	TRUE
YC-p20B + YN-CIPK24	YC-p20B + YN-CP	67.4184	0.001	50.2931	84.5438	TRUE
YC-p20B + YN-CIPK24	mCherry	-8.5628	0.5327	-25.6881	8.5626	FALSE
YC-p20B + YN-CP	mCherry	-75.9812	0.001	-93.1066	-58.8559	TRUE
CP - CP
ANOVA
	sum_sq	df	F	PR(>F)
C(Type)	10155.7	3	66.614	7.47e-14
Residual	1626.19	32
Tukey's HSD
group1	group2	meandiff	p-adj	lower	upper	reject
CIPK24-YC + YN-CP	CP-YC + YN-CIPK24	2.1668	0.9	-6.9378	11.2713	FALSE
CIPK24-YC + YN-CP	CP-YC + YN-CP	22.1308	0.001	13.0262	31.2353	TRUE
CIPK24-YC + YN-CP	mCherry	-25.1821	0.001	-34.2867	-16.0775	TRUE
CP-YC + YN-CIPK24	CP-YC + YN-CP	19.964	0.001	10.8594	29.0686	TRUE
CP-YC + YN-CIPK24	mCherry	-27.3489	0.001	-36.4535	-18.2443	TRUE
CP-YC + YN-CP	mCherry	-47.3129	0.001	-56.4175	-38.2083	TRUE
p20B - CPm
ANOVA
	sum_sq	df	F	PR(>F)
C(Type)	12615.9	3	121.509	1.44e-17
Residual	1107.48	32
Tukey's HSD
group1	group2	meandiff	p-adj	lower	upper	reject
YC-CIPK24 + YN-CPm	YC-p20B + YN-CIPK24	-22.606	0.001	-30.1195	-15.0925	TRUE
YC-CIPK24 + YN-CPm	YC-p20B + YN-CPm	16.3902	0.001	8.8767	23.9037	TRUE
YC-CIPK24 + YN-CPm	mCherry	-31.1688	0.001	-38.6823	-23.6553	TRUE
YC-p20B + YN-CIPK24	YC-p20B + YN-CPm	38.9962	0.001	31.4827	46.5097	TRUE
YC-p20B + YN-CIPK24	mCherry	-8.5628	0.0205	-16.0763	-1.0493	TRUE
YC-p20B + YN-CPm	mCherry	-47.559	0.001	-55.0725	-40.0455	TRUE
Table S2: Statistical analyses of BiFC data. Protein combinations are given in the header of each subsection. ANOVA table: c(Type): between sample types; residual: within sample types; sum_sq: sum of squares; df: degrees of freedom; F: ratio of explained variance to unexplained variance; PR>F: probability of accepting the null hypothesis: that any differences in variance between groups compared t…
