# Supplementary material for: Identification of Interactions between Proteins Encoded by Grapevine Leafroll-Associated Virus 3
Source: Viruses. 2023 Jan 11;15(1):208. doi: 10.3390/v15010208 (PMC9865355; doi:10.3390/v15010208)
Supplement: Supplementary file 1 [file viruses-15-00208-s001.zip › Table S3.xlsm]

## Sheet: TopCons_Table
Sequence name	Genus	Species	Isolate	Protein accession number	Reference accession number	Group	Amino acid sequence	TOPCONS predicted topology	OCTOPUS predicted topology	Philius predicted topology	PolyPhobius predicted topology	SCAMPI predicted topology	SPOCTOPUS predicted topology	Consensus
GLRaV-3 isolate AU173 partial genome 5 kDa protein	Ampelovirus	Grapevine leafroll-associated virus 3	AU173	AXI81920.1	MH521088	GROUP I	MDDFKQAILLLVVDFVFVIILLLVLTFVVPRLQQSSTINTGLRTV	iiiiiiiiMMMMMMMMMMMMMMMMMMMMMoooooooooooooooo	iiiiiiiiMMMMMMMMMMMMMMMMMMMMMoooooooooooooooo	iiiiiiMMMMMMMMMMMMMMMMMMMMMMMoooooooooooooooo	iiiiiiMMMMMMMMMMMMMMMMMMMMMMMoooooooooooooooo	iiiiiiiiMMMMMMMMMMMMMMMMMMMMMoooooooooooooooo	iiiiiiiiMMMMMMMMMMMMMMMMMMMMMoooooooooooooooo	IMO (6/6)
GLRaV-3 isolate BHA172 partial genome 5 kDa protein	Ampelovirus	Grapevine leafroll-associated virus 3	BHA172	AXI81931.1	MH521089	GROUP I	MDDFKQAILLLVVDFVFVIILLLVLTFVVPRLQQSSTINTGLRTV	iiiiiiiiMMMMMMMMMMMMMMMMMMMMMoooooooooooooooo	iiiiiiiiMMMMMMMMMMMMMMMMMMMMMoooooooooooooooo	iiiiiiMMMMMMMMMMMMMMMMMMMMMMMoooooooooooooooo	iiiiiiMMMMMMMMMMMMMMMMMMMMMMMoooooooooooooooo	iiiiiiiiMMMMMMMMMMMMMMMMMMMMMoooooooooooooooo	iiiiiiiiMMMMMMMMMMMMMMMMMMMMMoooooooooooooooo	IMO (6/6)
GLRaV-3 isolate Cha103 partial genome 5 kDa protein	Ampelovirus	Grapevine leafroll-associated virus 3	Cha103	AXI81967.1	MH521092	GROUP I	MDDFKQAILLLVVDFVFVIILLLVLTFVVPRLQQSSTINTGLRTV	iiiiiiiiMMMMMMMMMMMMMMMMMMMMMoooooooooooooooo	iiiiiiiiMMMMMMMMMMMMMMMMMMMMMoooooooooooooooo	iiiiiiMMMMMMMMMMMMMMMMMMMMMMMoooooooooooooooo	iiiiiiMMMMMMMMMMMMMMMMMMMMMMMoooooooooooooooo	iiiiiiiiMMMMMMMMMMMMMMMMMMMMMoooooooooooooooo	iiiiiiiiMMMMMMMMMMMMMMMMMMMMMoooooooooooooooo	IMO (6/6)
GLRaV-3 isolate Cha106 partial genome 5 kDa protein	Ampelovirus	Grapevine leafroll-associated virus 3	Cha106	AXI81977.1	MH521093	GROUP I	MDDFKQAILLLVVDFVFVIILLLVLTFVVPRLQQSSTINTGLRTV	iiiiiiiiMMMMMMMMMMMMMMMMMMMMMoooooooooooooooo	iiiiiiiiMMMMMMMMMMMMMMMMMMMMMoooooooooooooooo	iiiiiiMMMMMMMMMMMMMMMMMMMMMMMoooooooooooooooo	iiiiiiMMMMMMMMMMMMMMMMMMMMMMMoooooooooooooooo	iiiiiiiiMMMMMMMMMMMMMMMMMMMMMoooooooooooooooo	iiiiiiiiMMMMMMMMMMMMMMMMMMMMMoooooooooooooooo	IMO (6/6)
GLRaV-3 isolate Cha138b partial genome 5 kDa protein	Ampelovirus	Grapevine leafroll-associated virus 3	Cha138b	AXI82014.1	MH521096	GROUP I	MDDFKQAILLLVVDFVFVIILLLVLTFVVPRLQQSSTINTGLRTV	iiiiiiiiMMMMMMMMMMMMMMMMMMMMMoooooooooooooooo	iiiiiiiiMMMMMMMMMMMMMMMMMMMMMoooooooooooooooo	iiiiiiMMMMMMMMMMMMMMMMMMMMMMMoooooooooooooooo	iiiiiiMMMMMMMMMMMMMMMMMMMMMMMoooooooooooooooo	iiiiiiiiMMMMMMMMMMMMMMMMMMMMMoooooooooooooooo	iiiiiiiiMMMMMMMMMMMMMMMMMMMMMoooooooooooooooo	IMO (6/6)
GLRaV-3 isolate Dk256 partial genome 5 kDa protein	Ampelovirus	Grapevine leafroll-associated virus 3	Dk256	AXI82076.1	MH521101	GROUP I	MDDFKQAILLLVVDFVFVIILLLVLTFVVPRLQQSSTINTGLRTV	iiiiiiiiMMMMMMMMMMMMMMMMMMMMMoooooooooooooooo	iiiiiiiiMMMMMMMMMMMMMMMMMMMMMoooooooooooooooo	iiiiiiMMMMMMMMMMMMMMMMMMMMMMMoooooooooooooooo	iiiiiiMMMMMMMMMMMMMMMMMMMMMMMoooooooooooooooo	iiiiiiiiMMMMMMMMMMMMMMMMMMMMMoooooooooooooooo	iiiiiiiiMMMMMMMMMMMMMMMMMMMMMoooooooooooooooo	IMO (6/6)
GLRaV-3 isolate Ita218 partial genome 5 kDa protein	Ampelovirus	Grapevine leafroll-associated virus 3	Ita218	AXI82135.1	MH521106	GROUP I	MDDFKQAILLLVVDFVFVIILLLVLTFVVPRLQQSSTINTGLRTV	iiiiiiiiMMMMMMMMMMMMMMMMMMMMMoooooooooooooooo	iiiiiiiiMMMMMMMMMMMMMMMMMMMMMoooooooooooooooo	iiiiiiMMMMMMMMMMMMMMMMMMMMMMMoooooooooooooooo	iiiiiiMMMMMMMMMMMMMMMMMMMMMMMoooooooooooooooo	iiiiiiiiMMMMMMMMMMMMMMMMMMMMMoooooooooooooooo	iiiiiiiiMMMMMMMMMMMMMMMMMMMMMoooooooooooooooo	IMO (6/6)
GLRaV-3 isolate Ita219 partial genome 5 kDa protein	Ampelovirus	Grapevine leafroll-associated virus 3	Ita219	AXI82148.1	MH521107	GROUP I	MDDFKQAILLLVVDFVFVIILLLVLTFVVPRLQQSSTINTGLRTV	iiiiiiiiMMMMMMMMMMMMMMMMMMMMMoooooooooooooooo	iiiiiiiiMMMMMMMMMMMMMMMMMMMMMoooooooooooooooo	iiiiiiMMMMMMMMMMMMMMMMMMMMMMMoooooooooooooooo	iiiiiiMMMMMMMMMMMMMMMMMMMMMMMoooooooooooooooo	iiiiiiiiMMMMMMMMMMMMMMMMMMMMMoooooooooooooooo	iiiiiiiiMMMMMMMMMMMMMMMMMMMMMoooooooooooooooo	IMO (6/6)
GLRaV-3 isolate Kat255 partial genome 5 kDa protein	Ampelovirus	Grapevine leafroll-associated virus 3	Kat255	AXI82161.1	MH521108	GROUP I	MDDFKQAILLLVVDFVFVIILLLVLTFVVPRLQQSSTINSGLRTV	iiiiiiiiMMMMMMMMMMMMMMMMMMMMMoooooooooooooooo	iiiiiiiiMMMMMMMMMMMMMMMMMMMMMoooooooooooooooo	iiiiiiMMMMMMMMMMMMMMMMMMMMMMMoooooooooooooooo	iiiiiiMMMMMMMMMMMMMMMMMMMMMMMoooooooooooooooo	iiiiiiiiMMMMMMMMMMMMMMMMMMMMMoooooooooooooooo	iiiiiiiiMMMMMMMMMMMMMMMMMMMMMoooooooooooooooo	IMO (6/6)
GLRaV-3 isolate Kis24 partial genome 5 kDa protein	Ampelovirus	Grapevine leafroll-associated virus 3	Kis24	AXI82185.1	MH521110	GROUP I	MDDFKQAILLLVVDFVFVIILLLVLTFVVPRLQQSSTINTGLRTV	iiiiiiiiMMMMMMMMMMMMMMMMMMMMMoooooooooooooooo	iiiiiiiiMMMMMMMMMMMMMMMMMMMMMoooooooooooooooo	iiiiiiMMMMMMMMMMMMMMMMMMMMMMMoooooooooooooooo	iiiiiiMMMMMMMMMMMMMMMMMMMMMMMoooooooooooooooo	iiiiiiiiMMMMMMMMMMMMMMMMMMMMMoooooooooooooooo	iiiiiiiiMMMMMMMMMMMMMMMMMMMMMoooooooooooooooo	IMO (6/6)
GLRaV-3 isolate Kis252 partial genome 5 kDa protein	Ampelovirus	Grapevine leafroll-associated virus 3	Kis252	AXI82196.1	MH521111	GROUP I	MDDFKQAILLLVVDFVFVIILLLVLTFVVPRLQQSSTINTGLRTV	iiiiiiiiMMMMMMMMMMMMMMMMMMMMMoooooooooooooooo	iiiiiiiiMMMMMMMMMMMMMMMMMMMMMoooooooooooooooo	iiiiiiMMMMMMMMMMMMMMMMMMMMMMMoooooooooooooooo	iiiiiiMMMMMMMMMMMMMMMMMMMMMMMoooooooooooooooo	iiiiiiiiMMMMMMMMMMMMMMMMMMMMMoooooooooooooooo	iiiiiiiiMMMMMMMMMMMMMMMMMMMMMoooooooooooooooo	IMO (6/6)
GLRaV-3 isolate LN3204 partial genome 5 kDa protein	Ampelovirus	Grapevine leafroll-associated virus 3	LN3204	AXI82207.1	MH521112	GROUP I	MDDFKQAILLLVVDFVFVIILLLVLTFVVPRLQQSSTINTGLRTV	iiiiiiiiMMMMMMMMMMMMMMMMMMMMMoooooooooooooooo	iiiiiiiiMMMMMMMMMMMMMMMMMMMMMoooooooooooooooo	iiiiiiMMMMMMMMMMMMMMMMMMMMMMMoooooooooooooooo	iiiiiiMMMMMMMMMMMMMMMMMMMMMMMoooooooooooooooo	iiiiiiiiMMMMMMMMMMMMMMMMMMMMMoooooooooooooooo	iiiiiiiiMMMMMMMMMMMMMMMMMMMMMoooooooooooooooo	IMO (6/6)
GLRaV-3 isolate Mal162 partial genome 5 kDa protein	Ampelovirus	Grapevine leafroll-associated virus 3	Mal162	AXI82219.1	MH521113	GROUP I	MDDFKQAILLLVVDFVFVIILLLVLTFVVPRLQQSSTINTGLRTV	iiiiiiiiMMMMMMMMMMMMMMMMMMMMMoooooooooooooooo	iiiiiiiiMMMMMMMMMMMMMMMMMMMMMoooooooooooooooo	iiiiiiMMMMMMMMMMMMMMMMMMMMMMMoooooooooooooooo	iiiiiiMMMMMMMMMMMMMMMMMMMMMMMoooooooooooooooo	iiiiiiiiMMMMMMMMMMMMMMMMMMMMMoooooooooooooooo	iiiiiiiiMMMMMMMMMMMMMMMMMMMMMoooooooooooooooo	IMO (6/6)
GLRaV-3 isolate Pin244 partial genome 5 kDa protein	Ampelovirus	Grapevine leafroll-associated virus 3	Pin244	AXI82257.1	MH521116	GROUP I	MDDFKQAILLLVVDFVFVIILLLVLTFVVPRLQQSSTINTGLRTV	iiiiiiiiMMMMMMMMMMMMMMMMMMMMMoooooooooooooooo	iiiiiiiiMMMMMMMMMMMMMMMMMMMMMoooooooooooooooo	iiiiiiMMMMMMMMMMMMMMMMMMMMMMMoooooooooooooooo	iiiiiiMMMMMMMMMMMMMMMMMMMMMMMoooooooooooooooo	iiiiiiiiMMMMMMMMMMMMMMMMMMMMMoooooooooooooooo	iiiiiiiiMMMMMMMMMMMMMMMMMMMMMoooooooooooooooo	IMO (6/6)
GLRaV-3 isolate Tou260 partial genome 5 kDa protein	Ampelovirus	Grapevine leafroll-associated virus 3	Tou260	AXI82294.1	MH521119	GROUP I	MDDFKQAILLLVVDFVFVIILLLVLTFVVPRLQQSSTINTGLRTV	iiiiiiiiMMMMMMMMMMMMMMMMMMMMMoooooooooooooooo	iiiiiiiiMMMMMMMMMMMMMMMMMMMMMoooooooooooooooo	iiiiiiMMMMMMMMMMMMMMMMMMMMMMMoooooooooooooooo	iiiiiiMMMMMMMMMMMMMMMMMMMMMMMoooooooooooooooo	iiiiiiiiMMMMMMMMMMMMMMMMMMMMMoooooooooooooooo	iiiiiiiiMMMMMMMMMMMMMMMMMMMMMoooooooooooooooo	IMO (6/6)
GLRaV-3 isolate WA-MR complete genome 5 kDa protein	Ampelovirus	Grapevine leafroll-associated virus 3	WA-MR	ADM07407.1	GU983863	GROUP I	MDDFKQAILLLVVDFVFVIILLLVLTFVVPRLQQSSTINTGLRTV	iiiiiiiiMMMMMMMMMMMMMMMMMMMMMoooooooooooooooo	iiiiiiiiMMMMMMMMMMMMMMMMMMMMMoooooooooooooooo	iiiiiiMMMMMMMMMMMMMMMMMMMMMMMoooooooooooooooo	iiiiiiMMMMMMMMMMMMMMMMMMMMMMMoooooooooooooooo	iiiiiiiiMMMMMMMMMMMMMMMMMMMMMoooooooooooooooo	iiiiiiiiMMMMMMMMMMMMMMMMMMMMMoooooooooooooooo	IMO (6/6)
GLRaV-3 isolate TRAJ-BR complete genome 5 kDa protein	Ampelovirus	Grapevine leafroll-associated virus 3	TRAJ-BR	AOS89868.1	KX756669	GROUP I	MDDFKQAILLLVVDFVFVIILLLVLTFVVPRLQQSSTINTGLRTV	iiiiiiiiMMMMMMMMMMMMMMMMMMMMMoooooooooooooooo	iiiiiiiiMMMMMMMMMMMMMMMMMMMMMoooooooooooooooo	iiiiiiMMMMMMMMMMMMMMMMMMMMMMMoooooooooooooooo	iiiiiiMMMMMMMMMMMMMMMMMMMMMMMoooooooooooooooo	iiiiiiiiMMMMMMMMMMMMMMMMMMMMMoooooooooooooooo	iiiiiiiiMMMMMMMMMMMMMMMMMMMMMoooooooooooooooo	IMO (6/6)
GLRaV-3 isolate 621 complete genome 5 kDa protein	Ampelovirus	Grapevine leafroll-associated virus 3	621	ADI49415.1	GQ352631	GROUP I	MDDFKQAILLLVVDFVFVIILLLVLTFVVPRLQQSSTINTGLRTV	iiiiiiiiMMMMMMMMMMMMMMMMMMMMMoooooooooooooooo	iiiiiiiiMMMMMMMMMMMMMMMMMMMMMoooooooooooooooo	iiiiiiMMMMMMMMMMMMMMMMMMMMMMMoooooooooooooooo	iiiiiiMMMMMMMMMMMMMMMMMMMMMMMoooooooooooooooo	iiiiiiiiMMMMMMMMMMMMMMMMMMMMMoooooooooooooooo	iiiiiiiiMMMMMMMMMMMMMMMMMMMMMoooooooooooooooo	IMO (6/6)
GLRaV-3 isolate 3138-07 complete genome 5 kDa protein	Ampelovirus	Grapevine leafroll-associated virus 3	3138-07	AFV73382.1	JX559645	GROUP I	MDDFKQAILLLVVDFVFVIILLLVLTFVVPRLQQSSTINTGLRTV	iiiiiiiiMMMMMMMMMMMMMMMMMMMMMoooooooooooooooo	iiiiiiiiMMMMMMMMMMMMMMMMMMMMMoooooooooooooooo	iiiiiiMMMMMMMMMMMMMMMMMMMMMMMoooooooooooooooo	iiiiiiMMMMMMMMMMMMMMMMMMMMMMMoooooooooooooooo	iiiiiiiiMMMMMMMMMMMMMMMMMMMMMoooooooooooooooo	iiiiiiiiMMMMMMMMMMMMMMMMMMMMMoooooooooooooooo	IMO (6/6)
GLRaV-3 isolate GLRaV3-ID46 complete genome 5 kDa protein	Ampelovirus	Grapevine leafroll-associated virus 3	GLRaV3-ID46	AXY96732.1	MH796135	GROUP I	MDDFKQAILLLVVDFVFVIILLLVLTFVVPRLQQSSTINTGLRTV	iiiiiiiiMMMMMMMMMMMMMMMMMMMMMoooooooooooooooo	iiiiiiiiMMMMMMMMMMMMMMMMMMMMMoooooooooooooooo	iiiiiiMMMMMMMMMMMMMMMMMMMMMMMoooooooooooooooo	iiiiiiMMMMMMMMMMMMMMMMMMMMMMMoooooooooooooooo	iiiiiiiiMMMMMMMMMMMMMMMMMMMMMoooooooooooooooo	iiiiiiiiMMMMMMMMMMMMMMMMMMMMMoooooooooooooooo	IMO (6/6)
GLRaV-3 isolate Cl-766 complete genome 5 kDa protein	Ampelovirus	Grapevine leafroll-associated virus 3	Cl-766	ACA51528.1	EU344893	GROUP I	MDDFKQAILLLVVDFVFVIILLLVLTFVVPRLQQSSTINTGLRTV	iiiiiiiiMMMMMMMMMMMMMMMMMMMMMoooooooooooooooo	iiiiiiiiMMMMMMMMMMMMMMMMMMMMMoooooooooooooooo	iiiiiiMMMMMMMMMMMMMMMMMMMMMMMoooooooooooooooo	iiiiiiMMMMMMMMMMMMMMMMMMMMMMMoooooooooooooooo	iiiiiiiiMMMMMMMMMMMMMMMMMMMMMoooooooooooooooo	iiiiiiiiMMMMMMMMMMMMMMMMMMMMMoooooooooooooooo	IMO (6/6)
GLRaV-3 complete genome 5 kDa protein	Ampelovirus	Grapevine leafroll-associated virus 3	N/A	AAC40707.1	AF037268	GROUP I	MDDFKQAILLLVVDFVFVIILLLVLTFVVPRLQQSSTINTGLRTV	iiiiiiiiMMMMMMMMMMMMMMMMMMMMMoooooooooooooooo	iiiiiiiiMMMMMMMMMMMMMMMMMMMMMoooooooooooooooo	iiiiiiMMMMMMMMMMMMMMMMMMMMMMMoooooooooooooooo	iiiiiiMMMMMMMMMMMMMMMMMMMMMMMoooooooooooooooo	iiiiiiiiMMMMMMMMMMMMMMMMMMMMMoooooooooooooooo	iiiiiiiiMMMMMMMMMMMMMMMMMMMMMoooooooooooooooo	IMO (6/6)
GLRaV-3 isolate Cha247 partial genome 5 kDa protein	Ampelovirus	Grapevine leafroll-associated virus 3	Cha247	AXI82063.1	MH521100	GROUP II	MDDFKQAILLLVVDFVFVILLLLVLTFVIPRLQQSATFNTGLRTV	iiiiiiiiMMMMMMMMMMMMMMMMMMMMMoooooooooooooooo	iiiiiiiiMMMMMMMMMMMMMMMMMMMMMoooooooooooooooo	iiiiiiMMMMMMMMMMMMMMMMMMMMMMMoooooooooooooooo	iiiiiiMMMMMMMMMMMMMMMMMMMMMMMoooooooooooooooo	iiiiiiiiMMMMMMMMMMMMMMMMMMMMMoooooooooooooooo	iiiiiiiiMMMMMMMMMMMMMMMMMMMMMoooooooooooooooo	IMO (6/6)
GLRaV-3 isolate Mer240 partial genome 5 kDa protein	Ampelovirus	Grapevine leafroll-associated virus 3	Mer240	AXI82244.1	MH521115	GROUP II	MDDFKQAILLLVVDFVFVIILLLVITFVVPRLQQSSTINTGLRTV	iiiiiiiiMMMMMMMMMMMMMMMMMMMMMoooooooooooooooo	iiiiiiiiMMMMMMMMMMMMMMMMMMMMMoooooooooooooooo	iiiiiiMMMMMMMMMMMMMMMMMMMMMMMoooooooooooooooo	iiiiiiMMMMMMMMMMMMMMMMMMMMMMMoooooooooooooooo	iiiiiiiiMMMMMMMMMMMMMMMMMMMMMoooooooooooooooo	iiiiiiiiMMMMMMMMMMMMMMMMMMMMMoooooooooooooooo	IMO (6/6)
GLRaV-3 complete genome p5	Ampelovirus	Grapevine leafroll-associated virus 3	N/A	AIW06638.1	KJ174518	GROUP II	MDDFKQAILLLVVDFVFVIILLLVITFVVPRLQQSSTINTGLRTV	iiiiiiiiMMMMMMMMMMMMMMMMMMMMMoooooooooooooooo	iiiiiiiiMMMMMMMMMMMMMMMMMMMMMoooooooooooooooo	iiiiiiMMMMMMMMMMMMMMMMMMMMMMMoooooooooooooooo	iiiiiiMMMMMMMMMMMMMMMMMMMMMMMoooooooooooooooo	iiiiiiiiMMMMMMMMMMMMMMMMMMMMMoooooooooooooooo	iiiiiiiiMMMMMMMMMMMMMMMMMMMMMoooooooooooooooo	IMO (6/6)
GLRaV-3 isolate ISAB-BR complete genome 5 kDa protein	Ampelovirus	Grapevine leafroll-associated virus 3	ISAB-BR	AOS89856.1	KX701860	GROUP II	MDDFKQAILLLVVDFVFVIILLLVITFVVPRLQQSTTINTGLRTV	iiiiiiiiMMMMMMMMMMMMMMMMMMMMMoooooooooooooooo	iiiiiiiiMMMMMMMMMMMMMMMMMMMMMoooooooooooooooo	iiiiiiMMMMMMMMMMMMMMMMMMMMMMMoooooooooooooooo	iiiiiiMMMMMMMMMMMMMMMMMMMMMMMoooooooooooooooo	iiiiiiiiMMMMMMMMMMMMMMMMMMMMMoooooooooooooooo	iiiiiiiiMMMMMMMMMMMMMMMMMMMMMoooooooooooooooo	IMO (6/6)
GLRaV-3 isolate TC-BR complete genome 5 kDa protein	Ampelovirus	Grapevine leafroll-associated virus 3	TC-BR	AOS89844.1	KX756668	GROUP II	MDDFKQAILLLVVDFVFVIILLLVITFVVPRLQQSSTINTGLRTV	iiiiiiiiMMMMMMMMMMMMMMMMMMMMMoooooooooooooooo	iiiiiiiiMMMMMMMMMMMMMMMMMMMMMoooooooooooooooo	iiiiiiMMMMMMMMMMMMMMMMMMMMMMMoooooooooooooooo	iiiiiiMMMMMMMMMMMMMMMMMMMMMMMoooooooooooooooo	iiiiiiiiMMMMMMMMMMMMMMMMMMMMMoooooooooooooooo	iiiiiiiiMMMMMMMMMMMMMMMMMMMMMoooooooooooooooo	IMO (6/6)
GLRaV-3 isolate 623 complete genome 5 kDa protein	Ampelovirus	Grapevine leafroll-associated virus 3	623	ADI49428.1	GQ352632	GROUP II	MDDFKQAILLLVVDFVFVIILLLVITFVVPRLQQSSTINTGLRTV	iiiiiiiiMMMMMMMMMMMMMMMMMMMMMoooooooooooooooo	iiiiiiiiMMMMMMMMMMMMMMMMMMMMMoooooooooooooooo	iiiiiiMMMMMMMMMMMMMMMMMMMMMMMoooooooooooooooo	iiiiiiMMMMMMMMMMMMMMMMMMMMMMMoooooooooooooooo	iiiiiiiiMMMMMMMMMMMMMMMMMMMMMoooooooooooooooo	iiiiiiiiMMMMMMMMMMMMMMMMMMMMMoooooooooooooooo	IMO (6/6)
GLRaV-3 isolate GP18 complete genome 5 kDa protein	Ampelovirus	Grapevine leafroll-associated virus 3	GP18	ABY87016.1	EU259806	GROUP II	MDDFKQAILLLVVDFVFVIILLLVITFVVPRLQQSSTINTGLRTV	iiiiiiiiMMMMMMMMMMMMMMMMMMMMMoooooooooooooooo	iiiiiiiiMMMMMMMMMMMMMMMMMMMMMoooooooooooooooo	iiiiiiMMMMMMMMMMMMMMMMMMMMMMMoooooooooooooooo	iiiiiiMMMMMMMMMMMMMMMMMMMMMMMoooooooooooooooo	iiiiiiiiMMMMMMMMMMMMMMMMMMMMMoooooooooooooooo	iiiiiiiiMMMMMMMMMMMMMMMMMMMMMoooooooooooooooo	IMO (6/6)
GLRaV-3 isolate Cha246b partial genome 5 kDa protein	Ampelovirus	Grapevine leafroll-associated virus 3	Cha246b	AXI82050.1	MH521099	GROUP III	MDDFKQAILLLVVDFVFVILLLLVLTFVIPRLQQSATFNTGLRTV	iiiiiiiiMMMMMMMMMMMMMMMMMMMMMoooooooooooooooo	iiiiiiiiMMMMMMMMMMMMMMMMMMMMMoooooooooooooooo	iiiiiiMMMMMMMMMMMMMMMMMMMMMMMoooooooooooooooo	iiiiiiMMMMMMMMMMMMMMMMMMMMMMMoooooooooooooooo	iiiiiiiiMMMMMMMMMMMMMMMMMMMMMoooooooooooooooo	iiiiiiiiMMMMMMMMMMMMMMMMMMMMMoooooooooooooooo	IMO (6/6)
GLRaV-3 isolate Gor259 partial genome 5 kDa protein	Ampelovirus	Grapevine leafroll-associated virus 3	Gor259	AXI82110.1	MH521104	GROUP III	MDDFKQAILLLVVDFVFVILLLLVLTFVIPRLQQSATFNTGLRTV	iiiiiiiiMMMMMMMMMMMMMMMMMMMMMoooooooooooooooo	iiiiiiiiMMMMMMMMMMMMMMMMMMMMMoooooooooooooooo	iiiiiiMMMMMMMMMMMMMMMMMMMMMMMoooooooooooooooo	iiiiiiMMMMMMMMMMMMMMMMMMMMMMMoooooooooooooooo	iiiiiiiiMMMMMMMMMMMMMMMMMMMMMoooooooooooooooo	iiiiiiiiMMMMMMMMMMMMMMMMMMMMMoooooooooooooooo	IMO (6/6)
GLRaV-3 isolate Pin249 partial genome 5 kDa protein	Ampelovirus	Grapevine leafroll-associated virus 3	Pin249	AXI82281.1	MH521118	GROUP III	MDDFKQAILLLVVDFVFVILLLLVLTFVIPRLQQSATFNTGLRTV	iiiiiiiiMMMMMMMMMMMMMMMMMMMMMoooooooooooooooo	iiiiiiiiMMMMMMMMMMMMMMMMMMMMMoooooooooooooooo	iiiiiiMMMMMMMMMMMMMMMMMMMMMMMoooooooooooooooo	iiiiiiMMMMMMMMMMMMMMMMMMMMMMMoooooooooooooooo	iiiiiiiiMMMMMMMMMMMMMMMMMMMMMoooooooooooooooo	iiiiiiiiMMMMMMMMMMMMMMMMMMMMMoooooooooooooooo	IMO (6/6)
GLRaV-3 isolate LN complete genome 5 kDa protein	Ampelovirus	Grapevine leafroll-associated virus 3	LN	AFU55327.1	JQ423939	GROUP III	MDDFKQAILLLVVDFVFVILLLLVLTFVIPRLQQSATFNTGLRTV	iiiiiiiiMMMMMMMMMMMMMMMMMMMMMoooooooooooooooo	iiiiiiiiMMMMMMMMMMMMMMMMMMMMMoooooooooooooooo	iiiiiiMMMMMMMMMMMMMMMMMMMMMMMoooooooooooooooo	iiiiiiMMMMMMMMMMMMMMMMMMMMMMMoooooooooooooooo	iiiiiiiiMMMMMMMMMMMMMMMMMMMMMoooooooooooooooo	iiiiiiiiMMMMMMMMMMMMMMMMMMMMMoooooooooooooooo	IMO (6/6)
GLRaV-3 complete genome 5 kDa protein	Ampelovirus	Grapevine leafroll-associated virus 3	N/A	AWD77997.1	MF991951	GROUP III	MDDFKQAILLLVVDFVFVILLLLVLTFVIPRLQQSATFNTGLRTV	iiiiiiiiMMMMMMMMMMMMMMMMMMMMMoooooooooooooooo	iiiiiiiiMMMMMMMMMMMMMMMMMMMMMoooooooooooooooo	iiiiiiMMMMMMMMMMMMMMMMMMMMMMMoooooooooooooooo	iiiiiiMMMMMMMMMMMMMMMMMMMMMMMoooooooooooooooo	iiiiiiiiMMMMMMMMMMMMMMMMMMMMMoooooooooooooooo	iiiiiiiiMMMMMMMMMMMMMMMMMMMMMoooooooooooooooo	IMO (6/6)
GLRaV-3 isolate PL-20 complete genome 5 kDa protein	Ampelovirus	Grapevine leafroll-associated virus 3	PL-20	ADI49441.1	GQ352633	GROUP III	MDDFKQAILLLVVDFVFVILLLLVLTFVIPRLQQSATFNTGLRTV	iiiiiiiiMMMMMMMMMMMMMMMMMMMMMoooooooooooooooo	iiiiiiiiMMMMMMMMMMMMMMMMMMMMMoooooooooooooooo	iiiiiiMMMMMMMMMMMMMMMMMMMMMMMoooooooooooooooo	iiiiiiMMMMMMMMMMMMMMMMMMMMMMMoooooooooooooooo	iiiiiiiiMMMMMMMMMMMMMMMMMMMMMoooooooooooooooo	iiiiiiiiMMMMMMMMMMMMMMMMMMMMMoooooooooooooooo	IMO (6/6)
GLRaV-3 isolate GLRaV-3 -I-LR101 complete genome 5 kDa protein	Ampelovirus	Grapevine leafroll-associated virus 3	GLRaV-3_-I-LR101	AST24350.1	KY886362	GROUP III	MDDFKQAILLLVVDFVFVILLLLVLTFVIPRLQQSATFNTGLRTV	iiiiiiiiMMMMMMMMMMMMMMMMMMMMMoooooooooooooooo	iiiiiiiiMMMMMMMMMMMMMMMMMMMMMoooooooooooooooo	iiiiiiMMMMMMMMMMMMMMMMMMMMMMMoooooooooooooooo	iiiiiiMMMMMMMMMMMMMMMMMMMMMMMoooooooooooooooo	iiiiiiiiMMMMMMMMMMMMMMMMMMMMMoooooooooooooooo	iiiiiiiiMMMMMMMMMMMMMMMMMMMMMoooooooooooooooo	IMO (6/6)
GLRaV-3 isolate Pro95 partial genome 5 kDa protein	Ampelovirus	Grapevine leafroll-associated virus 3	Pro95	AVD53856.1	KY707824	GROUP IX	MDDFKQAILLLVVDFVFVIVLLIVVSFVVPRLQQSSALNTGLRTV	iiiiiiiiMMMMMMMMMMMMMMMMMMMMMoooooooooooooooo	iiiiiiiiMMMMMMMMMMMMMMMMMMMMMoooooooooooooooo	iiiiiiMMMMMMMMMMMMMMMMMMMMMMMoooooooooooooooo	iiiiiiMMMMMMMMMMMMMMMMMMMMMMMoooooooooooooooo	iiiiiiiiMMMMMMMMMMMMMMMMMMMMMoooooooooooooooo	iiiiiiiiMMMMMMMMMMMMMMMMMMMMMoooooooooooooooo	IMO (6/6)
GLRaV-3 isolate Rod96 partial genome 5 kDa protein	Ampelovirus	Grapevine leafroll-associated virus 3	Rod96	AVD53866.1	KY707825	GROUP IX	MDDFKQAILLLVVDFVFVIVLLIVVSFVVPRLQQSSALNTGLRTV	iiiiiiiiMMMMMMMMMMMMMMMMMMMMMoooooooooooooooo	iiiiiiiiMMMMMMMMMMMMMMMMMMMMMoooooooooooooooo	iiiiiiMMMMMMMMMMMMMMMMMMMMMMMoooooooooooooooo	iiiiiiMMMMMMMMMMMMMMMMMMMMMMMoooooooooooooooo	iiiiiiiiMMMMMMMMMMMMMMMMMMMMMoooooooooooooooo	iiiiiiiiMMMMMMMMMMMMMMMMMMMMMoooooooooooooooo	IMO (6/6)
GLRaV-3 isolate Trc138 partial genome 5 kDa protein	Ampelovirus	Grapevine leafroll-associated virus 3	Trc138	AVN99295.1	KY764333	GROUP IX	MDDFKQAILLLVVDFVFVIVLLIVVSFVVPRLQQSSALNTGLRTV	iiiiiiiiMMMMMMMMMMMMMMMMMMMMMoooooooooooooooo	iiiiiiiiMMMMMMMMMMMMMMMMMMMMMoooooooooooooooo	iiiiiiMMMMMMMMMMMMMMMMMMMMMMMoooooooooooooooo	iiiiiiMMMMMMMMMMMMMMMMMMMMMMMoooooooooooooooo	iiiiiiiiMMMMMMMMMMMMMMMMMMMMMoooooooooooooooo	iiiiiiiiMMMMMMMMMMMMMMMMMMMMMoooooooooooooooo	IMO (6/6)
GLRaV-3 isolate Bla223 partial genome 5 kDa protein	Ampelovirus	Grapevine leafroll-associated virus 3	Bla223	AXI81944.1	MH521090	GROUP IX	MDDFKQAILLLVVDFAFVIILLLVLTFVVPRLQQSSTINTGLRTV	iiiiiiiiMMMMMMMMMMMMMMMMMMMMMoooooooooooooooo	iiiiiiiiMMMMMMMMMMMMMMMMMMMMMoooooooooooooooo	iiiiiiMMMMMMMMMMMMMMMMMMMMMMMoooooooooooooooo	iiiiiiMMMMMMMMMMMMMMMMMMMMMMMoooooooooooooooo	iiiiiiiiMMMMMMMMMMMMMMMMMMMMMoooooooooooooooo	iiiiiiiiMMMMMMMMMMMMMMMMMMMMMoooooooooooooooo	IMO (6/6)
GLRaV-3 isolate Cab248 partial genome 5 kDa protein	Ampelovirus	Grapevine leafroll-associated virus 3	Cab248	AXI81955.1	MH521091	GROUP IX	MDDFKQAILLLVVDFVFVIVLLIVVSFVVPRLQQSSALNTGLRTV	iiiiiiiiMMMMMMMMMMMMMMMMMMMMMoooooooooooooooo	iiiiiiiiMMMMMMMMMMMMMMMMMMMMMoooooooooooooooo	iiiiiiMMMMMMMMMMMMMMMMMMMMMMMoooooooooooooooo	iiiiiiMMMMMMMMMMMMMMMMMMMMMMMoooooooooooooooo	iiiiiiiiMMMMMMMMMMMMMMMMMMMMMoooooooooooooooo	iiiiiiiiMMMMMMMMMMMMMMMMMMMMMoooooooooooooooo	IMO (6/6)
GLRaV-3 isolate Cha246 partial genome 5 kDa protein	Ampelovirus	Grapevine leafroll-associated virus 3	Cha246	AXI82038.1	MH521098	GROUP IX	MDDFKQAILLLVVDFVFVIVLLIVVSFVVPRLQQSSALNTGLRTV	iiiiiiiiMMMMMMMMMMMMMMMMMMMMMoooooooooooooooo	iiiiiiiiMMMMMMMMMMMMMMMMMMMMMoooooooooooooooo	iiiiiiMMMMMMMMMMMMMMMMMMMMMMMoooooooooooooooo	iiiiiiMMMMMMMMMMMMMMMMMMMMMMMoooooooooooooooo	iiiiiiiiMMMMMMMMMMMMMMMMMMMMMoooooooooooooooo	iiiiiiiiMMMMMMMMMMMMMMMMMMMMMoooooooooooooooo	IMO (6/6)
GLRaV-3 isolate 245 partial genome 5 kDa protein	Ampelovirus	Grapevine leafroll-associated virus 3	245	AXI82098.1	MH521103	GROUP IX	MDDFKQAILLLVVDFVFVIVLLIVVSFVVPRLQQSSALNTGLRTV	iiiiiiiiMMMMMMMMMMMMMMMMMMMMMoooooooooooooooo	iiiiiiiiMMMMMMMMMMMMMMMMMMMMMoooooooooooooooo	iiiiiiMMMMMMMMMMMMMMMMMMMMMMMoooooooooooooooo	iiiiiiMMMMMMMMMMMMMMMMMMMMMMMoooooooooooooooo	iiiiiiiiMMMMMMMMMMMMMMMMMMMMMoooooooooooooooo	iiiiiiiiMMMMMMMMMMMMMMMMMMMMMoooooooooooooooo	IMO (6/6)
GLRaV-3 isolate Pin244b partial genome 5 kDa protein	Ampelovirus	Grapevine leafroll-associated virus 3	Pin244b	AXI82269.1	MH521117	GROUP IX	MDDFKQAILLLVVDFIFVIVLLIVVSFVVPRLQQSSALNTGLRTV	iiiiiiiiMMMMMMMMMMMMMMMMMMMMMoooooooooooooooo	iiiiiiiiMMMMMMMMMMMMMMMMMMMMMoooooooooooooooo	iiiiiiMMMMMMMMMMMMMMMMMMMMMMMoooooooooooooooo	iiiiiiMMMMMMMMMMMMMMMMMMMMMMMoooooooooooooooo	iiiiiiiiMMMMMMMMMMMMMMMMMMMMMoooooooooooooooo	iiiiiiiiMMMMMMMMMMMMMMMMMMMMMoooooooooooooooo	IMO (6/6)
GLRaV-3 isolate Pro95 partial genome 5 kDa protein	Ampelovirus	Grapevine leafroll-associated virus 3	Pro95	AVD53856.1	KY707824	GROUP IX	MDDFKQAILLLVVDFVFVIVLLIVVSFVVPRLQQSSALNTGLRTV	iiiiiiiiMMMMMMMMMMMMMMMMMMMMMoooooooooooooooo	iiiiiiiiMMMMMMMMMMMMMMMMMMMMMoooooooooooooooo	iiiiiiMMMMMMMMMMMMMMMMMMMMMMMoooooooooooooooo	iiiiiiMMMMMMMMMMMMMMMMMMMMMMMoooooooooooooooo	iiiiiiiiMMMMMMMMMMMMMMMMMMMMMoooooooooooooooo	iiiiiiiiMMMMMMMMMMMMMMMMMMMMMoooooooooooooooo	IMO (6/6)
GLRaV-3 isolate GLRaV3-ID45 complete genome 5 kDa protein	Ampelovirus	Grapevine leafroll-associated virus 3	GLRaV3-ID45	AXY96744.1	MH796136	GROUP IX	MFMDDFKQAILLLVVDFVFVIVLLIVVSFVVPRLQQSSALNTGLRTV	iiiiiiiiiiMMMMMMMMMMMMMMMMMMMMMoooooooooooooooo	iiiiiiiiiiMMMMMMMMMMMMMMMMMMMMMoooooooooooooooo	iiiiiiiiMMMMMMMMMMMMMMMMMMMMMMMoooooooooooooooo	iiiiiiiiMMMMMMMMMMMMMMMMMMMMMMMoooooooooooooooo	iiiiiiiiiiMMMMMMMMMMMMMMMMMMMMMoooooooooooooooo	iiiiiiiiiiMMMMMMMMMMMMMMMMMMMMMoooooooooooooooo	IMO (6/6)
GLRaV-3 isolate 185 partial genome 5 kDa protein	Ampelovirus	Grapevine leafroll-associated virus 3	185	AXI82086.1	MH521102	GROUP V	MDDFKQAILLLVVDFLFVIILLLVLTFVVPRLQQSSTINTGLRTV	iiiiiiiiMMMMMMMMMMMMMMMMMMMMMoooooooooooooooo	iiiiiiiiMMMMMMMMMMMMMMMMMMMMMoooooooooooooooo	iiiiiiMMMMMMMMMMMMMMMMMMMMMMMoooooooooooooooo	iiiiiiMMMMMMMMMMMMMMMMMMMMMMMoooooooooooooooo	iiiiiiiiMMMMMMMMMMMMMMMMMMMMMoooooooooooooooo	iiiiiiiiMMMMMMMMMMMMMMMMMMMMMoooooooooooooooo	IMO (6/6)
GLRaV-3 isolate GH11 complete genome 5 kDa protein	Ampelovirus	Grapevine leafroll-associated virus 3	GH11	AFH35860.1	JQ655295	GROUP VI	MDDFRQAILILVVDFVFVIILLFVISFVVPRLQQGVAFNTGIRTV	iiiiiiiiMMMMMMMMMMMMMMMMMMMMMoooooooooooooooo	iiiiiiiiMMMMMMMMMMMMMMMMMMMMMoooooooooooooooo	iiiiiiMMMMMMMMMMMMMMMMMMMMMMMoooooooooooooooo	iiiiiiMMMMMMMMMMMMMMMMMMMMMMMoooooooooooooooo	iiiiiiiiMMMMMMMMMMMMMMMMMMMMMoooooooooooooooo	iiiiiiiiMMMMMMMMMMMMMMMMMMMMMoooooooooooooooo	IMO (6/6)
GLRaV-3 isolate GH30 complete genome 5 kDa protein	Ampelovirus	Grapevine leafroll-associated virus 3	GH30	AFH35872.1	JQ655296	GROUP VI	MDDFRQAILILVVDFVFVIILLFVISFVVPRLQQGVAFNTGIRTV	iiiiiiiiMMMMMMMMMMMMMMMMMMMMMoooooooooooooooo	iiiiiiiiMMMMMMMMMMMMMMMMMMMMMoooooooooooooooo	iiiiiiMMMMMMMMMMMMMMMMMMMMMMMoooooooooooooooo	iiiiiiMMMMMMMMMMMMMMMMMMMMMMMoooooooooooooooo	iiiiiiiiMMMMMMMMMMMMMMMMMMMMMoooooooooooooooo	iiiiiiiiMMMMMMMMMMMMMMMMMMMMMoooooooooooooooo	IMO (6/6)
GLRaV-3 clone 3 complete genome p5	Ampelovirus	Grapevine leafroll-associated virus 3	clone 3	AFV67454.1	JQ796828	GROUP VI	MDDFRQTILILVVDFVFVIILLLVISFIVPRLQQGVAFNTGIRTV	iiiiiiiiMMMMMMMMMMMMMMMMMMMMMoooooooooooooooo	iiiiiiiiMMMMMMMMMMMMMMMMMMMMMoooooooooooooooo	iiiiiiiMMMMMMMMMMMMMMMMMMMMMMoooooooooooooooo	iiiiiiMMMMMMMMMMMMMMMMMMMMMMMoooooooooooooooo	iiiiiiiiMMMMMMMMMMMMMMMMMMMMMoooooooooooooooo	iiiiiiiiMMMMMMMMMMMMMMMMMMMMMoooooooooooooooo	IMO (6/6)
GLRaV-3 isolate NZ1-B 5 kDa protein	Ampelovirus	Grapevine leafroll-associated virus 3	NZ1-B	AGE45906.1	JX220900	GROUP VI	MDDFRQAILILVVDFVFVIILLFVISFIVPRLQQGVAFNTGVRTV	iiiiiiiiMMMMMMMMMMMMMMMMMMMMMoooooooooooooooo	iiiiiiiiMMMMMMMMMMMMMMMMMMMMMoooooooooooooooo	iiiiiiMMMMMMMMMMMMMMMMMMMMMMMoooooooooooooooo	iiiiiiMMMMMMMMMMMMMMMMMMMMMMMoooooooooooooooo	iiiiiiiiMMMMMMMMMMMMMMMMMMMMMoooooooooooooooo	iiiiiiiiMMMMMMMMMMMMMMMMMMMMMoooooooooooooooo	IMO (6/6)
GLRaV-3 isolate NdA121 partial genome 5 kDa protein	Ampelovirus	Grapevine leafroll-associated virus 3	NdA121	AVD53877.1	KY707826	GROUP VII	MDDFTQVILLLVVDFVFVILLLVVISLVVPKLQQSATFSGGIRTV	iiiiiiiiMMMMMMMMMMMMMMMMMMMMMoooooooooooooooo	iiiiiiiiMMMMMMMMMMMMMMMMMMMMMoooooooooooooooo	iiiiiiMMMMMMMMMMMMMMMMMMMMMMMoooooooooooooooo	oooooMMMMMMMMMMMMMMMMMMMMMMMMiiiiiiiiiiiiiiii	iiiiiiiiMMMMMMMMMMMMMMMMMMMMMoooooooooooooooo	SSSSSSSSSSSSSSSSSSSSSSSSSSSSSSSSSSSoooooooooo	IMO (4/6)
GLRaV-3 isolate GH24 complete genome 5 kDa protein	Ampelovirus	Grapevine leafroll-associated virus 3	GH24	AIT52511.1	KM058745	GROUP VII	MDDFTQVILLLVVDFVFVILLLIVISLVVPKLQQSTTFGGGIRTV	iiiiiiiiMMMMMMMMMMMMMMMMMMMMMoooooooooooooooo	iiiiiiiiMMMMMMMMMMMMMMMMMMMMMoooooooooooooooo	iiiiiiMMMMMMMMMMMMMMMMMMMMMMMoooooooooooooooo	oooooMMMMMMMMMMMMMMMMMMMMMMMMiiiiiiiiiiiiiiii	iiiiiiiiMMMMMMMMMMMMMMMMMMMMMoooooooooooooooo	iiiiiiiiMMMMMMMMMMMMMMMMMMMMMoooooooooooooooo	IMO (5/6)
GLRaV-3 isolate Trc139 partial genome 5 kDa protein	Ampelovirus	Grapevine leafroll-associated virus 3	Trc139	AVN99283.1	KY764332	GROUP X	MDDFREAILILVVDFSFVILLLLIISFVVPKLQQGVAFNTGIRTV	iiiiiiiiMMMMMMMMMMMMMMMMMMMMMoooooooooooooooo	iiiiiiiiMMMMMMMMMMMMMMMMMMMMMoooooooooooooooo	iiiiiiMMMMMMMMMMMMMMMMMMMMMMMoooooooooooooooo	iiiiiiMMMMMMMMMMMMMMMMMMMMMMMoooooooooooooooo	iiiiiiiiMMMMMMMMMMMMMMMMMMMMMoooooooooooooooo	iiiiiiiiMMMMMMMMMMMMMMMMMMMMMoooooooooooooooo	IMO (6/6)
GLRaV-3 isolate Cha137 partial genome 5 kDa protein	Ampelovirus	Grapevine leafroll-associated virus 3	Cha137	AXI81989.1	MH521094	GROUP X	MDDFREAILILVVDFSFVILLLLIISFVVPKLQQGVAFNTGIRTV	iiiiiiiiMMMMMMMMMMMMMMMMMMMMMoooooooooooooooo	iiiiiiiiMMMMMMMMMMMMMMMMMMMMMoooooooooooooooo	iiiiiiMMMMMMMMMMMMMMMMMMMMMMMoooooooooooooooo	iiiiiiMMMMMMMMMMMMMMMMMMMMMMMoooooooooooooooo	iiiiiiiiMMMMMMMMMMMMMMMMMMMMMoooooooooooooooo	iiiiiiiiMMMMMMMMMMMMMMMMMMMMMoooooooooooooooo	IMO (6/6)
GLRaV-3 isolate Cha138 partial genome 5 kDa protein	Ampelovirus	Grapevine leafroll-associated virus 3	Cha138	AXI82001.1	MH521095	GROUP X	MDDFREAILILVVDFSFVILLLLIISFVVPKLQQGVAFNTGIRTV	iiiiiiiiMMMMMMMMMMMMMMMMMMMMMoooooooooooooooo	iiiiiiiiMMMMMMMMMMMMMMMMMMMMMoooooooooooooooo	iiiiiiMMMMMMMMMMMMMMMMMMMMMMMoooooooooooooooo	iiiiiiMMMMMMMMMMMMMMMMMMMMMMMoooooooooooooooo	iiiiiiiiMMMMMMMMMMMMMMMMMMMMMoooooooooooooooo	iiiiiiiiMMMMMMMMMMMMMMMMMMMMMoooooooooooooooo	IMO (6/6)
GLRaV-3 isolate Cha141 partial genome 5 kDa protein	Ampelovirus	Grapevine leafroll-associated virus 3	Cha141	AXI82026.1	MH521097	GROUP X	MDDFREAILILVVDFSFVILLLLIISFVVPKLQQGVAFNTGIRTV	iiiiiiiiMMMMMMMMMMMMMMMMMMMMMoooooooooooooooo	iiiiiiiiMMMMMMMMMMMMMMMMMMMMMoooooooooooooooo	iiiiiiMMMMMMMMMMMMMMMMMMMMMMMoooooooooooooooo	iiiiiiMMMMMMMMMMMMMMMMMMMMMMMoooooooooooooooo	iiiiiiiiMMMMMMMMMMMMMMMMMMMMMoooooooooooooooo	iiiiiiiiMMMMMMMMMMMMMMMMMMMMMoooooooooooooooo	IMO (6/6)
GLRaV-3 isolate Vdl complete genome p5	Ampelovirus	Grapevine leafroll-associated virus 3	VdI	AZR37618.1	MK032068	no group	MDDFKQAILLLVVDFIFVIILLLVISVIVPRLQQGVAYNNGIRTV	iiiiiiiiMMMMMMMMMMMMMMMMMMMMMoooooooooooooooo	iiiiiiiiMMMMMMMMMMMMMMMMMMMMMoooooooooooooooo	iiiiiiMMMMMMMMMMMMMMMMMMMMMMMoooooooooooooooo	iiiiiiMMMMMMMMMMMMMMMMMMMMMMMoooooooooooooooo	iiiiiiiiMMMMMMMMMMMMMMMMMMMMMoooooooooooooooo	iiiiiiiiMMMMMMMMMMMMMMMMMMMMMoooooooooooooooo	IMO (6/6)
GLRaV-3 isolate Gre233 partial genome 5 kDa protein	Ampelovirus	Grapevine leafroll-associated virus 3	Gre233	AXI82122.1	MH521105	no group	MDDFRQAILILVVDFVFVIILLLVISFIVPRLQQGVAFNTGIRTV	iiiiiiiiMMMMMMMMMMMMMMMMMMMMMoooooooooooooooo	iiiiiiiiMMMMMMMMMMMMMMMMMMMMMoooooooooooooooo	iiiiiiMMMMMMMMMMMMMMMMMMMMMMMoooooooooooooooo	iiiiiiMMMMMMMMMMMMMMMMMMMMMMMoooooooooooooooo	iiiiiiiiMMMMMMMMMMMMMMMMMMMMMoooooooooooooooo	iiiiiiiiMMMMMMMMMMMMMMMMMMMMMoooooooooooooooo	IMO (6/6)
GLRaV-3 isolate Kat255b partial genome 5 kDa protein	Ampelovirus	Grapevine leafroll-associated virus 3	Kat255b	AXI82173.1	MH521109	no group	MDDFKQAILLLVVDFIFVIILLVVISFVIPRLQQSSAFNTGLRTV	iiiiiiiiMMMMMMMMMMMMMMMMMMMMMoooooooooooooooo	iiiiiiiiMMMMMMMMMMMMMMMMMMMMMoooooooooooooooo	iiiiiiMMMMMMMMMMMMMMMMMMMMMMMoooooooooooooooo	iiiiiiMMMMMMMMMMMMMMMMMMMMMMMoooooooooooooooo	iiiiiiiiMMMMMMMMMMMMMMMMMMMMMoooooooooooooooo	iiiiiiiiMMMMMMMMMMMMMMMMMMMMMoooooooooooooooo	IMO (6/6)
GLRaV-3 isolate Mar239 partial genome 5 kDa protein	Ampelovirus	Grapevine leafroll-associated virus 3	Mar239	AXI82231.1	MH521114	no group	MDDFRQAILILVVDFVFVIILLLVISFIVPRLQQGVAFNTGIRTV	iiiiiiiiMMMMMMMMMMMMMMMMMMMMMoooooooooooooooo	iiiiiiiiMMMMMMMMMMMMMMMMMMMMMoooooooooooooooo	iiiiiiMMMMMMMMMMMMMMMMMMMMMMMoooooooooooooooo	iiiiiiMMMMMMMMMMMMMMMMMMMMMMMoooooooooooooooo	iiiiiiiiMMMMMMMMMMMMMMMMMMMMMoooooooooooooooo	iiiiiiiiMMMMMMMMMMMMMMMMMMMMMoooooooooooooooo	IMO (6/6)
GLRaV-3 isolate 8415B complete genome 5 kDa protein	Ampelovirus	Grapevine leafroll-associated virus 3	8415B	ATG84351.1	KY073324	no group	MDDFKQAILLLVVDFIFVIILLIVISLVVPRLQQGPAFNTGLRTV	iiiiiiiiMMMMMMMMMMMMMMMMMMMMMoooooooooooooooo	iiiiiiiiMMMMMMMMMMMMMMMMMMMMMoooooooooooooooo	iiiiiiMMMMMMMMMMMMMMMMMMMMMMMoooooooooooooooo	iiiiiiMMMMMMMMMMMMMMMMMMMMMMMoooooooooooooooo	iiiiiiiiMMMMMMMMMMMMMMMMMMMMMoooooooooooooooo	iiiiiiiiMMMMMMMMMMMMMMMMMMMMMoooooooooooooooo	IMO (6/6)
GLRaV-3 isolate 8415A complete genome 5 kDa protein	Ampelovirus	Grapevine leafroll-associated virus 3	8415A	ATG84338.1	KY073323	no group	MDDFKQAILLLVVDFVFVIVLLIVISFIVPRLQSNTGFGGGIRTV	iiiiiiiiMMMMMMMMMMMMMMMMMMMMMoooooooooooooooo	iiiiiiiiMMMMMMMMMMMMMMMMMMMMMoooooooooooooooo	iiiiiiiMMMMMMMMMMMMMMMMMMMMMMoooooooooooooooo	iiiiiiMMMMMMMMMMMMMMMMMMMMMMMoooooooooooooooo	iiiiiiiiMMMMMMMMMMMMMMMMMMMMMoooooooooooooooo	iiiiiiiiMMMMMMMMMMMMMMMMMMMMMoooooooooooooooo	IMO (6/6)
Grapevine leafroll-associated virus 13 genomic RNA complete genome isolate: a177 putative transmembrane protein	Ampelovirus	Grapevine leafroll-associated virus 13	A177	BAU80810.1	LC052212	Not Applicable	MNRRAFDSDLRAIAVFLIAVASVGLISGGIFLIYKLRNKRLVDKESSDRSKSGNVYRQFPV	No transmembrane region detected	No transmembrane region detected	oooooooooooMMMMMMMMMMMMMMMMMMMMMMMiiiiiiiiiiiiiiiiiiiiiiiiiii	oooooooooooMMMMMMMMMMMMMMMMMMMMMMMiiiiiiiiiiiiiiiiiiiiiiiiiii	No transmembrane region detected	oooooooooooMMMMMMMMMMMMMMMMMMMMMooooooooooooooooooooooooooooo	OMI (3/3)
Grapevine leafroll-associated virus 4 isolate LR106 complete genome p5	Ampelovirus	Grapevine leafroll-associated virus 4	LR106	ACS44658.1	FJ467503	Not Applicable	MLDLFSQFNWVFQICAFILIILFFAVLALVVQKVFYSTIRGPAPPA	ooooooooooMMMMMMMMMMMMMMMMMMMMMiiiiiiiiiiiiiii	oooooooooooMMMMMMMMMMMMMMMMMMMMMiiiiiiiiiiiiii	oooooooooMMMMMMMMMMMMMMMMMMMMMMiiiiiiiiiiiiiii	ooooooMMMMMMMMMMMMMMMMMMMMMMMMMiiiiiiiiiiiiiii	oooooooooMMMMMMMMMMMMMMMMMMMMMiiiiiiiiiiiiiiii	oooooooooooMMMMMMMMMMMMMMMMMMMMMiiiiiiiiiiiiii	OMI(6/6)
Pineapple mealybug wilt-associated virus 3 small hydrophobic 5.65 kDa protein	Ampelovirus	Pineapple mealybug wilt-associated virus 3	N/A	ABD62349.1	DQ399259	Not Applicable	MIRVDNFLWAIYLLTFITISAIIVVLVVLIQRLLCPTSLPPNAQVPHGGGY	oooooooooMMMMMMMMMMMMMMMMMMMMMiiiiiiiiiiiiiiiiiiiii	ooooooooMMMMMMMMMMMMMMMMMMMMMiiiiiiiiiiiiiiiiiiiiii	iiiiiiiMMMMMMMMMMMMMMMMMMMMMMMooooooooooooooooooooo	oooooMMMMMMMMMMMMMMMMMMMMMMMMMiiiiiiiiiiiiiiiiiiiii	oooooooooMMMMMMMMMMMMMMMMMMMMMiiiiiiiiiiiiiiiiiiiii	oooooooooMMMMMMMMMMMMMMMMMMMMMiiiiiiiiiiiiiiiiiiiii	OMI(5/6)
Pineapple mealybug wilt-associated virus 1 complete genome small hydrophobic protein	Ampelovirus	Pineapple mealybug wilt-associated virus 1	N/A	AAL66710.1	AF414119	Not Applicable	MLRVDNFLWAIYLITFIALCAIIIVLILLFQRVLWPNSLPPNNPVPHGGGY	oooooooooMMMMMMMMMMMMMMMMMMMMMiiiiiiiiiiiiiiiiiiiii	ooooooooMMMMMMMMMMMMMMMMMMMMMiiiiiiiiiiiiiiiiiiiiii	iiiiiiiMMMMMMMMMMMMMMMMMMMMMMMooooooooooooooooooooo	oooooMMMMMMMMMMMMMMMMMMMMMMMMMiiiiiiiiiiiiiiiiiiiii	iiiiiiiiiMMMMMMMMMMMMMMMMMMMMMooooooooooooooooooooo	oooooooooMMMMMMMMMMMMMMMMMMMMMiiiiiiiiiiiiiiiiiiiii	OMI(4/6)
Air potato virus 1 isolate APV1-FL complete genome ORF2	Ampelovirus	Air potato virus 1	APV1-FL	AZB50208.1	MH206615	Not Applicable	MKVDDSVNTGVSFSIIVFTFFLLIVIAATVVFCLYFLFTKRRREQSGVERPTF	No transmembrane region detected	ooooooooooooooooooooooooooooooooooooooooooooooooooooo	ooooooooooooooMMMMMMMMMMMMMMMMMMMMMMMMiiiiiiiiiiiiiii	oooooooooooMMMMMMMMMMMMMMMMMMMMMMMMMMMiiiiiiiiiiiiiii	No transmembrane region detected	oooooooooooooMMMMMMMMMMMMMMMMMMMMMooooooooooooooooooo	OMI(4/6)
Plum bark necrosis and stem pitting-associated virus complete genome hydrophobic protein	Ampelovirus	Plum bark necrosis and stem pitting-associated virus	N/A	ABW81236.1	EF546442	Not Applicable	MSQTLLATDISQVLLVFLIAFCFLIFITASLGVGFCVYRLIRSESRATPENRAAPPY	oooooooooooooMMMMMMMMMMMMMMMMMMMMMiiiiiiiiiiiiiiiiiiiiiii	oooooooooooooMMMMMMMMMMMMMMMMMMMMMiiiiiiiiiiiiiiiiiiiiiii	oooooooooooooMMMMMMMMMMMMMMMMMMMMMMMMMiiiiiiiiiiiiiiiiiii	ooooooooooooMMMMMMMMMMMMMMMMMMMMMMMMMMiiiiiiiiiiiiiiiiiii	iMMMMMMMMMMMMMMMMMMMMMoMMMMMMMMMMMMMMMMMMMMMiiiiiiiiiiiii	ooooooooooooooMMMMMMMMMMMMMMMMMMMMMiiiiiiiiiiiiiiiiiiiiii	OMI(5/6)
Little cherry virus 2 isolate LChV-2-TA complete genome putative membrane protein	Ampelovirus	Little cherry virus 2	N/A	AYE57463.1	MG881767	Not Applicable	MTSNSVWQCSAFSFVLALLFAILLSSGTTILIIYLIIPQIKVLREKTNQVGERHTYI	oooooooooooooMMMMMMMMMMMMMMMMMMMMMiiiiiiiiiiiiiiiiiiiiiii	ooooooooooooMMMMMMMMMMMMMMMMMMMMMiiiiiiiiiiiiiiiiiiiiiiii	oooooooooooooMMMMMMMMMMMMMMMMMMMMMMMMiiiiiiiiiiiiiiiiiiii	oooooooooooooMMMMMMMMMMMMMMMMMMMMMMMMiiiiiiiiiiiiiiiiiiii	iMMMMMMMMMMMMMMMMMMMMMoMMMMMMMMMMMMMMMMMMMMMiiiiiiiiiiiii	SSSSSSSSSSSSSSSSSSSSSSSSSSSoooooooooooooooooooooooooooooo	OMI(4/6)
Pineapple mealybug wilt associated virus-2 hydrophobic protein p5	Ampelovirus	Pineapple mealybug wilt-associated virus 2	N/A	AAG13940.1	AF283103	Not Applicable	MLDAFTAITIIASLILAFLFLLILFIVVLVYNYYSRMHSSMRSYGAA	oooooooooMMMMMMMMMMMMMMMMMMMMMiiiiiiiiiiiiiiiii	oooooooooMMMMMMMMMMMMMMMMMMMMMiiiiiiiiiiiiiiiii	oooooooMMMMMMMMMMMMMMMMMMMMMMMMMMiiiiiiiiiiiiii	oooooMMMMMMMMMMMMMMMMMMMMMMMMMMMMMiiiiiiiiiiiii	oooooooooooooMMMMMMMMMMMMMMMMMMMMMiiiiiiiiiiiii	oooooooooMMMMMMMMMMMMMMMMMMMMMiiiiiiiiiiiiiiiii	OMI(6/6)
Blackberry vein banding associated virus isolate Mississippi1 complete genome p5	Ampelovirus	Blackberry vein banding associated virus	N/A	AGS48180.1	KC904540	Not Applicable	MDTDLFILLTVFLILLGVILFLLVIAFVVPRLQATAQGFYGTRA	iiiiiiMMMMMMMMMMMMMMMMMMMMMooooooooooooooooo	No transmembrane region detected	iiiiiiMMMMMMMMMMMMMMMMMMMMMMMooooooooooooooo	oooooMMMMMMMMMMMMMMMMMMMMMMMMiiiiiiiiiiiiiii	No transmembrane region detected	ooooooMMMMMMMMMMMMMMMMMMMMMooooooooooooooooo	IMO (2/4), OMI (2/4)
Grapevine leafroll-associated virus 1 isolate 1050 complete genome p7	Ampelovirus	Grapevine leafroll-associated virus 1	1050	AEW24403.1	JQ023131	Not Applicable	MDLRQFSHELLYTVSLFILVALCFVVYFIVRAIRHCCAKIEDKPVREPGNSSYRYVAQP	ooooooooooMMMMMMMMMMMMMMMMMMMMMiiiiiiiiiiiiiiiiiiiiiiiiiiii	oooooooooooMMMMMMMMMMMMMMMMMMMMMiiiiiiiiiiiiiiiiiiiiiiiiiii	oooooooooMMMMMMMMMMMMMMMMMMMMMiiiiiiiiiiiiiiiiiiiiiiiiiiiii	oooooooooooMMMMMMMMMMMMMMMMMMMMiiiiiiiiiiiiiiiiiiiiiiiiiiii	oooooooooMMMMMMMMMMMMMMMMMMMMMiiiiiiiiiiiiiiiiiiiiiiiiiiiii	oooooooooooMMMMMMMMMMMMMMMMMMMMMiiiiiiiiiiiiiiiiiiiiiiiiiii	OMI(6/6)
Citrus tristeza virus isolate A18 complete genome p6 small hydrophobic protein	Closterovirus	Citrus tristeza virus	A18	AFL55387.1	JQ798289	CTV A18	MDCVIQGFLTFLVGIAVFSAFAGLIIIVITIYRCTTKPVRNASPYGTHVTV	oooooooMMMMMMMMMMMMMMMMMMMMMiiiiiiiiiiiiiiiiiiiiiii	oooooooMMMMMMMMMMMMMMMMMMMMMiiiiiiiiiiiiiiiiiiiiiii	oooooooMMMMMMMMMMMMMMMMMMMMMMMMMiiiiiiiiiiiiiiiiiii	oooooMMMMMMMMMMMMMMMMMMMMMMMMMMMiiiiiiiiiiiiiiiiiii	oooooooMMMMMMMMMMMMMMMMMMMMMiiiiiiiiiiiiiiiiiiiiiii	oooooooMMMMMMMMMMMMMMMMMMMMMiiiiiiiiiiiiiiiiiiiiiii	OMI(6/6)
Citrus tristeza virus isolate LMS6-6 complete genome p6 protein	Closterovirus	Citrus tristeza virus	LMS6-6	ANW12426.1	KU883267	CTV HA16-5	MDCVIQGFLTFLVGIAVFSAFAGLIIIVITIYRCTTKPVRNTSPYGTHVTV	oooooooMMMMMMMMMMMMMMMMMMMMMiiiiiiiiiiiiiiiiiiiiiii	ooooooMMMMMMMMMMMMMMMMMMMMMiiiiiiiiiiiiiiiiiiiiiiii	oooooooMMMMMMMMMMMMMMMMMMMMMMMMMiiiiiiiiiiiiiiiiiii	oooooMMMMMMMMMMMMMMMMMMMMMMMMMMMiiiiiiiiiiiiiiiiiii	oooooooMMMMMMMMMMMMMMMMMMMMMiiiiiiiiiiiiiiiiiiiiiii	oooooooMMMMMMMMMMMMMMMMMMMMMiiiiiiiiiiiiiiiiiiiiiii	OMI(6/6)
Citrus tristeza virus strain CN-L1-ZT1 complete genome p6	Closterovirus	Citrus tristeza virus	CN-L1-ZT1	QDD55763.1	MH323441	CTV L1	MDCVIQGFLTFLVGIAVFSAFAGLIIIVITIYRCTTKPVRNASSYGTHVTV	oooooooMMMMMMMMMMMMMMMMMMMMMiiiiiiiiiiiiiiiiiiiiiii	oooooooMMMMMMMMMMMMMMMMMMMMMiiiiiiiiiiiiiiiiiiiiiii	oooooooMMMMMMMMMMMMMMMMMMMMMMMMMiiiiiiiiiiiiiiiiiii	oooooMMMMMMMMMMMMMMMMMMMMMMMMMMMiiiiiiiiiiiiiiiiiii	oooooooMMMMMMMMMMMMMMMMMMMMMiiiiiiiiiiiiiiiiiiiiiii	oooooooMMMMMMMMMMMMMMMMMMMMMiiiiiiiiiiiiiiiiiiiiiii	OMI(6/6)
Citrus tristeza virus strain CN-M1-ZT1 complete genome p6	Closterovirus	Citrus tristeza virus	CN-M1-ZT1	QDD55775.1	MH323442	CTV M1	MDCVIQGFLTFLVGIAVFSAFAGLIIIVITIYRCTTKPVRNTSSYGTHVTV	oooooooMMMMMMMMMMMMMMMMMMMMMiiiiiiiiiiiiiiiiiiiiiii	oooooooMMMMMMMMMMMMMMMMMMMMMiiiiiiiiiiiiiiiiiiiiiii	oooooooMMMMMMMMMMMMMMMMMMMMMMMMMiiiiiiiiiiiiiiiiiii	oooooMMMMMMMMMMMMMMMMMMMMMMMMMMMiiiiiiiiiiiiiiiiiii	oooooooMMMMMMMMMMMMMMMMMMMMMiiiiiiiiiiiiiiiiiiiiiii	oooooooMMMMMMMMMMMMMMMMMMMMMiiiiiiiiiiiiiiiiiiiiiii	OMI(6/6)
Citrus tristeza virus isolate B390-5 complete genome p6 protein	Closterovirus	Citrus tristeza virus	B390-5	ANW12402.1	KU883265	CTV RB	MDCVIQGFLTFLVGIAVFSAFAGLIIIVITIYRCTTKPVRNTSPYGTHATV	oooooooMMMMMMMMMMMMMMMMMMMMMiiiiiiiiiiiiiiiiiiiiiii	oooooooMMMMMMMMMMMMMMMMMMMMMiiiiiiiiiiiiiiiiiiiiiii	oooooooMMMMMMMMMMMMMMMMMMMMMMMMMiiiiiiiiiiiiiiiiiii	oooooMMMMMMMMMMMMMMMMMMMMMMMMMMMiiiiiiiiiiiiiiiiiii	oooooooMMMMMMMMMMMMMMMMMMMMMiiiiiiiiiiiiiiiiiiiiiii	oooooooMMMMMMMMMMMMMMMMMMMMMiiiiiiiiiiiiiiiiiiiiiii	OMI(6/6)
Citrus tristeza virus isolate CA-S1-L complete genome p6 protein	Closterovirus	Citrus tristeza virus	CA-S1-L	AMK04960.1	KU589212	CTV S1	MDCVIQGFLTFLVGIAVFSAFAGLIIIVITIYRCTTKPVRSASPYGTHATV	oooooooMMMMMMMMMMMMMMMMMMMMMiiiiiiiiiiiiiiiiiiiiiii	oooooooMMMMMMMMMMMMMMMMMMMMMiiiiiiiiiiiiiiiiiiiiiii	oooooooMMMMMMMMMMMMMMMMMMMMMMMMMiiiiiiiiiiiiiiiiiii	oooooMMMMMMMMMMMMMMMMMMMMMMMMMMMiiiiiiiiiiiiiiiiiii	oooooooMMMMMMMMMMMMMMMMMMMMMiiiiiiiiiiiiiiiiiiiiiii	oooooooMMMMMMMMMMMMMMMMMMMMMiiiiiiiiiiiiiiiiiiiiiii	OMI(6/6)
Citrus tristeza virus isolate T3-KB complete genome p6 ORF	Closterovirus	Citrus tristeza virus	T3-KBB	AYK26864.1	MH051719	CTV T3	MDCVIQGFLTFLVGIAVFSAFAGLIIIVITIYRCTTKPVRNTSPYGTHATI	oooooooMMMMMMMMMMMMMMMMMMMMMiiiiiiiiiiiiiiiiiiiiiii	oooooooMMMMMMMMMMMMMMMMMMMMMiiiiiiiiiiiiiiiiiiiiiii	oooooooMMMMMMMMMMMMMMMMMMMMMMMMMiiiiiiiiiiiiiiiiiii	oooooMMMMMMMMMMMMMMMMMMMMMMMMMMMiiiiiiiiiiiiiiiiiii	oooooooMMMMMMMMMMMMMMMMMMMMMiiiiiiiiiiiiiiiiiiiiiii	oooooooMMMMMMMMMMMMMMMMMMMMMiiiiiiiiiiiiiiiiiiiiiii	OMI(6/6)
Citrus tristeza virus T30 complete genome p6 protein	Closterovirus	Citrus tristeza virus	T30	AAF70351.1	AF260651	CTV T30	MDCVIQGFLTFLVGIAVFSAFAGLIIIVITIYRCTTKPVRNTSPYGTHATV	oooooooMMMMMMMMMMMMMMMMMMMMMiiiiiiiiiiiiiiiiiiiiiii	oooooooMMMMMMMMMMMMMMMMMMMMMiiiiiiiiiiiiiiiiiiiiiii	oooooooMMMMMMMMMMMMMMMMMMMMMMMMMiiiiiiiiiiiiiiiiiii	oooooMMMMMMMMMMMMMMMMMMMMMMMMMMMiiiiiiiiiiiiiiiiiii	oooooooMMMMMMMMMMMMMMMMMMMMMiiiiiiiiiiiiiiiiiiiiiii	oooooooMMMMMMMMMMMMMMMMMMMMMiiiiiiiiiiiiiiiiiiiiiii	OMI(6/6)
Citrus tristeza virus complete genome 6-kDa protein NC	Closterovirus	Citrus tristeza virus	T36	NP042863.1	NC001661	CTV T36	MDCVIQGFLTFLVGIAVFCAFAGLIIIVITIYRCTIKPVRSASPYGTHATV	oooooooMMMMMMMMMMMMMMMMMMMMMiiiiiiiiiiiiiiiiiiiiiii	oooooooMMMMMMMMMMMMMMMMMMMMMiiiiiiiiiiiiiiiiiiiiiii	oooooooMMMMMMMMMMMMMMMMMMMMMMMMMiiiiiiiiiiiiiiiiiii	oooooMMMMMMMMMMMMMMMMMMMMMMMMMMMiiiiiiiiiiiiiiiiiii	oooooooMMMMMMMMMMMMMMMMMMMMMiiiiiiiiiiiiiiiiiiiiiii	oooooooMMMMMMMMMMMMMMMMMMMMMiiiiiiiiiiiiiiiiiiiiiii	OMI(6/6)
Citrus tristeza virus isolate GFMS12-8 complete genome p6 ORF	Closterovirus	Citrus tristeza virus	GFMS12-8	AYJ77141.1	MK033511	CTV T68	MDCVIQGFLTFLVGIAVFSAFAGLIIIVITIYRCTTKPVRNASPYGTHATV	oooooooMMMMMMMMMMMMMMMMMMMMMiiiiiiiiiiiiiiiiiiiiiii	oooooooMMMMMMMMMMMMMMMMMMMMMiiiiiiiiiiiiiiiiiiiiiii	oooooooMMMMMMMMMMMMMMMMMMMMMMMMMiiiiiiiiiiiiiiiiiii	oooooMMMMMMMMMMMMMMMMMMMMMMMMMMMiiiiiiiiiiiiiiiiiii	oooooooMMMMMMMMMMMMMMMMMMMMMiiiiiiiiiiiiiiiiiiiiiii	oooooooMMMMMMMMMMMMMMMMMMMMMiiiiiiiiiiiiiiiiiiiiiii	OMI(6/6)
Citrus tristeza virus strain VT complete genome p6	Closterovirus	Citrus tristeza virus	VT	ACH79943.1	EU937519	CTV VT	MDCVIQGFLTFLVGIAVFSAFAGLIIIVITIYRCTTKPVRNASPYGTHATI	oooooooMMMMMMMMMMMMMMMMMMMMMiiiiiiiiiiiiiiiiiiiiiii	oooooooMMMMMMMMMMMMMMMMMMMMMiiiiiiiiiiiiiiiiiiiiiii	oooooooMMMMMMMMMMMMMMMMMMMMMMMMMiiiiiiiiiiiiiiiiiii	oooooMMMMMMMMMMMMMMMMMMMMMMMMMMMiiiiiiiiiiiiiiiiiii	oooooooMMMMMMMMMMMMMMMMMMMMMiiiiiiiiiiiiiiiiiiiiiii	oooooooMMMMMMMMMMMMMMMMMMMMMiiiiiiiiiiiiiiiiiiiiiii	OMI(6/6)
Beet yellows virus complete genome putative membrane-binding protein	Closterovirus	Beet yellows virus	N/A	NP041871.1	NC001598	Not Applicable	MDCVLRSYLLLAFGFLICLFLFCLVVFIWFVYKQILFRTTAQSNEARHNHSTVV	oooooooooMMMMMMMMMMMMMMMMMMMMMiiiiiiiiiiiiiiiiiiiiiiii	oooooooooMMMMMMMMMMMMMMMMMMMMMiiiiiiiiiiiiiiiiiiiiiiii	iiiiiiiMMMMMMMMMMMMMMMMMMMMMMMMMoooooooooooooooooooooo	oooooMMMMMMMMMMMMMMMMMMMMMMMMMMMiiiiiiiiiiiiiiiiiiiiii	oooooooMMMMMMMMMMMMMMMMMMMMMiiiiiiiiiiiiiiiiiiiiiiiiii	oooooooooMMMMMMMMMMMMMMMMMMMMMiiiiiiiiiiiiiiiiiiiiiiii	OMI(5/6)
Table S3: Membrane topology prediction results of members of the family Closteroviridae. Predictions were made using six different algorithms in TOPCONS. Sequence name, genus, species, isolate names, protein accession numbers and reference accession numbers are provided. Where applicable, variant groups are also stated. Amino acid sequences are provided. The results of each of the algorithm predi…
